# Supplementary material
Source: MDPI journal article supplement (https://www.mdpi.com/2073-4344/13/3/590)
Supplement: s1 [file s1]

# Highly Efficient Au/ZnO–ZrO<sub>2</sub> Catalysts for CO Oxidation at Low Temperature

Roberto Camposeco, Viridiana Maturano-Rojas and Rodolfo Zanella \*

Instituto de Ciencias Aplicadas y Tecnología, Universidad Nacional Autónoma de México, Circuito Exterior S/N, C. U., Mexico City 04510, Mexico

\* Correspondence: rodolfo.zanella@icat.unam.mx

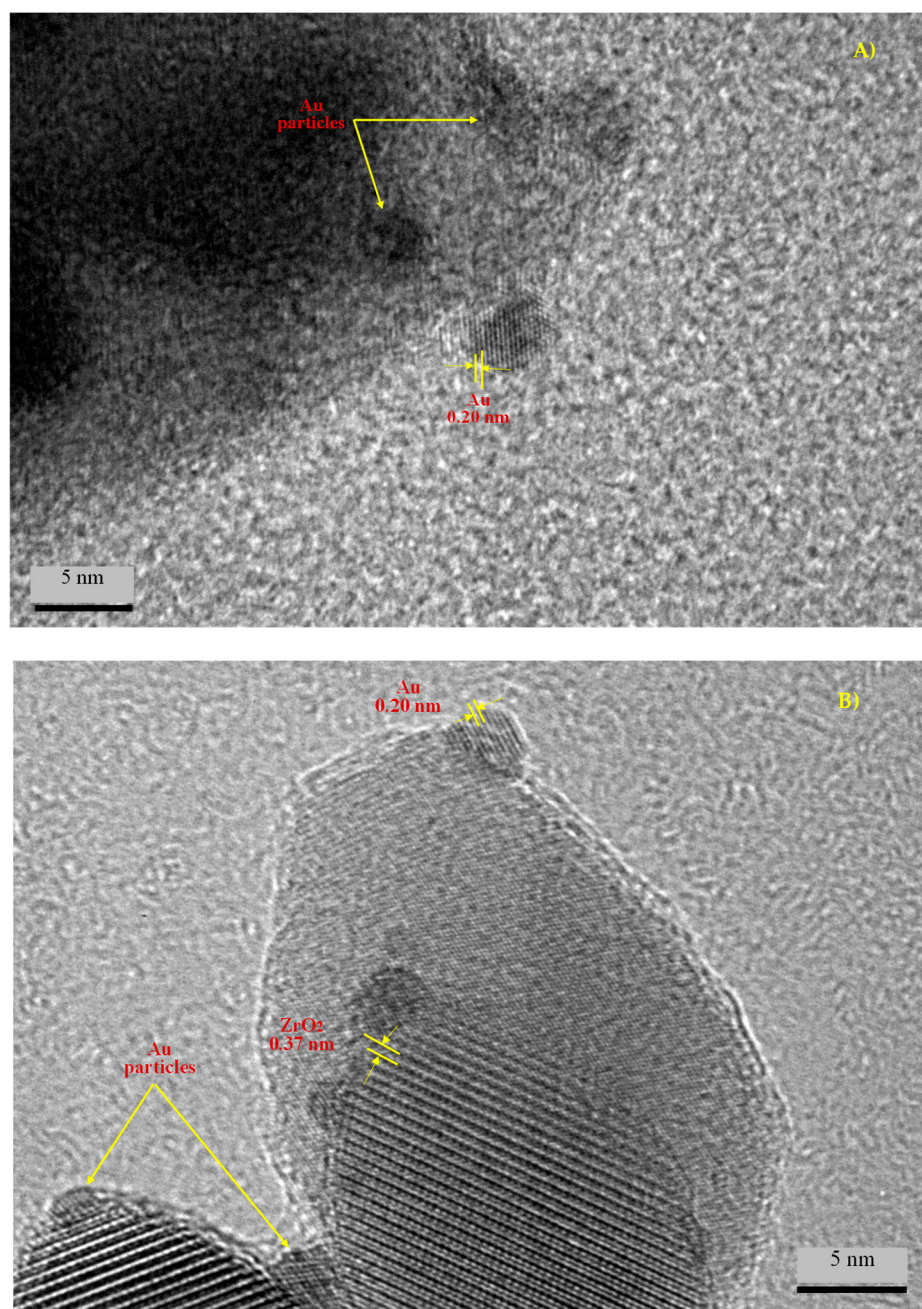

**Figure S1.** (A) HRTEM images of the 3Au/ZnO catalyst annealed at 200°C in air and (B) HRTEM images of the 3Au/5ZnO-ZrO<sub>2</sub> catalyst annealed at 200°C in air.

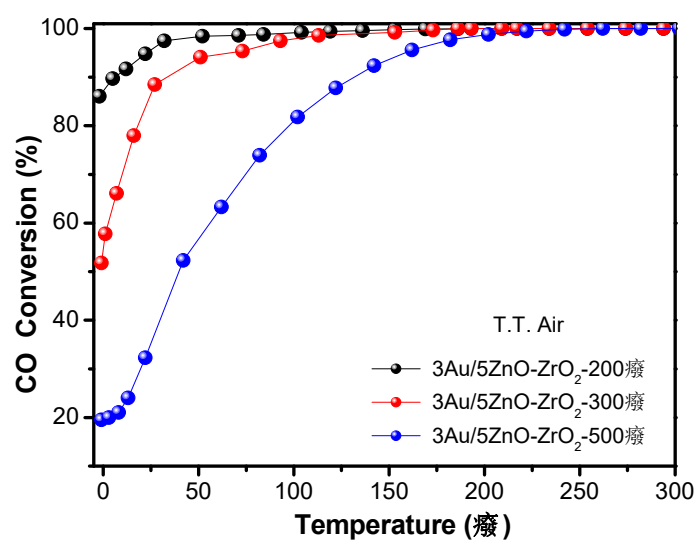

**Figure S2.** CO conversions for  $3\text{Au}/5\text{ZnO-ZrO}_2$  at different temperatures, treated under air atmosphere.
